# Supplementary material
Source: Springer Nature journal article supplement (https://www.springermedizin.de/resource/supplementary/12958_2005_221_MOESM4_ESM.pdf/9567394)

a

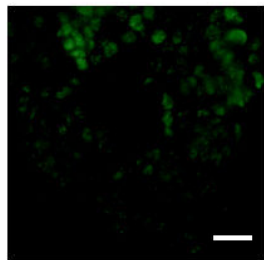

1

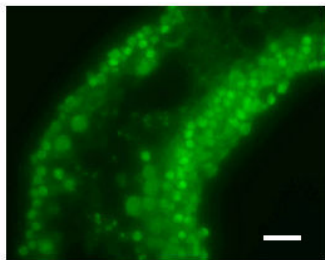

2

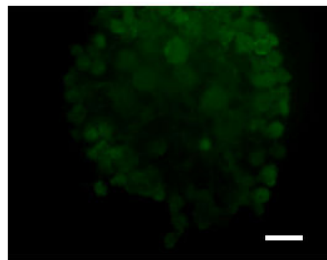

3

b

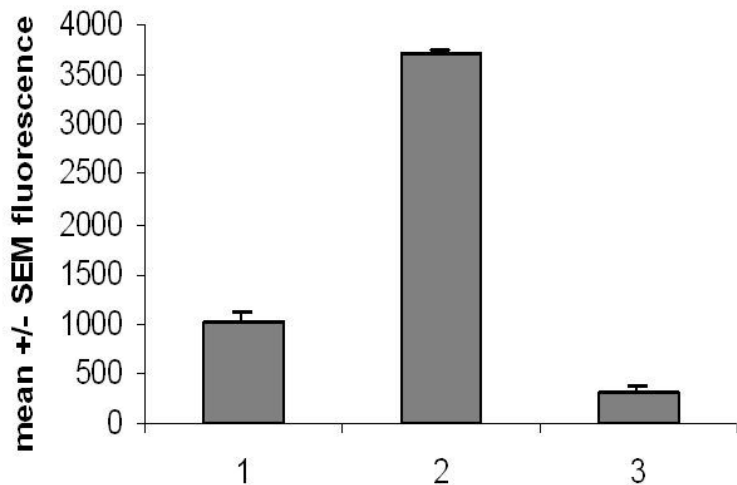

Supplement: MOESM4 [file 9567394]
